## References

- Booker, J. F., 1971, "Dynamically-Loaded Journal Bearings: Numerical Application of the Mobility Method," *ASME JOURNAL OF LUBRICATION TECHNOLOGY*, Vol. 93, pp. 168-176. Errata: Vol. 93, p. 315.
- Booker, J. F., 1989, "Basic Equations for Fluid Films with Variable Properties," *ASME JOURNAL OF TRIBOLOGY*, Vol. 111, pp. 475-483.
- Booker, J. F., 1990, "Classic Cavitation Models for Finite Element Analysis," *Current Research In Cavitating Fluid Films*, D. E. Brewe et al., eds., STLE Special Publication SP-28.
- Elrod, H. G., 1981, "A Cavitation Algorithm," *ASME JOURNAL OF LUBRICATION TECHNOLOGY*, Vol. 103, pp. 350-354.
- Goenka, P. K., 1984a, "Dynamically Loaded Journal Bearings: Finite Element Method Analysis," *ASME JOURNAL OF TRIBOLOGY*, Vol. 106, pp. 438-439.
- Goenka, P. K., 1984b, "Analytical Curve Fits for Solution Parameters of Dynamically Loaded Journal Bearings," *ASME JOURNAL OF TRIBOLOGY*, Vol. 106, p. 428.
- Kumar, A., and Booker, J. F., 1991, "A Finite Element Cavitation

Algorithm," *ASME JOURNAL OF TRIBOLOGY*, Vol. 113, No. 2, April, pp. 276-286.

- Kumar, A., 1991, "Mass Conservation in Cavitating Bearings: A Finite Element Approach," Ph.D. thesis, Cornell University, Ithaca, NY.
- LaBouff, G. A., and Booker, J. F., 1985, "Dynamically Loaded Journal Bearings: A Finite Element Treatment for Rigid and Elastic Surfaces," *ASME JOURNAL OF TRIBOLOGY*, Vol. 107, pp. 505-515.
- Lundholm, G. 1969, "The Circumferential Groove Journal Bearing Considering Cavitation and Dynamic Stability," *Acta Scandinavica, Mechanical Engineering Series*, Stockholm, Vol. 42.
- Phelan, R. M., 1950, "The Design and Development of a Machine for the Experimental Investigation of Dynamically Loaded Sleeve Bearings," M.M.E. thesis, Cornell University, Ithaca, NY.
- Phelan, R. M., 1961, "Non-Rotating Journal Bearings Under Sinusoidal Loads," *ASME Lubrication Symposium*, Miami, FL, May 8-9, Paper No. 61-Lubs-6.
- Smith, W. L., 1955, "Experimental Investigations of Dynamically Loaded Sleeve Bearings with No Shaft Rotation," M. S. thesis, Cornell University, Ithaca, NY.

## DISCUSSION

### G. Bayada<sup>1</sup>

The authors have performed an interesting comparison of two simulation results (and some experimental results), the first one with a conventional "quasi-static" cavitation algorithm, the second one with a new algorithm taking mass flow conservation through the whole surface of the bearing into account. The underlying question being: In what cases is it interesting to use the new more costly (I suppose) algorithm?

And the answer could be: In the two cases, solutions obtained with the new algorithm are closer to experimental measures. For the steadily rotating Lundholm journal bearing only the flow differs between the two models while for the pure transient Phelan bearing both load and flows differ.

Such results are not surprising as the "new" algorithm is concerned with the Jakobson-Floberg-Elrod model of cavitation for the resolution of which other algorithms already exist (Bayada et al., 1990; Brewe, 1986; Elrod, 1981) and these authors, following the same methodology, compared their results with those obtained using nonconservative Gumbel solution. Insensitivity of the load has been pointed out and discussed (see also Lebeck comments in the discussion of Brewe's paper). Have the authors any views of predicting for what kind of devices the new JFO model must be used?

The discussor is skeptical about the necessity of assuming boundary conditions on both pressure and vapor density at the bearing ends for the Lundholm bearing; mathematically, only the first one must be a data. How is this supplementary value chosen?

Finally, can the authors give a comparison of the time consumption between the two algorithms?

### Additional References

- Bayada, G., Chambat, M., and El Alaoui, M., 1990, "Variational Formulations and Finite Element Algorithms for Cavitation Problems," *ASME JOURNAL OF TRIBOLOGY*, Vol. 112, No. 2, pp. 398-403.
- Brewe, D. E., 1986, "Theoretical Modeling of the Vapor Cavitation Dynamically Loaded Journal Bearing," *ASME JOURNAL OF TRIBOLOGY*, Vol. 106, No. 4, pp. 628-638.

### Authors' Closure

As evidenced by his comments and first Additional Reference, Professor Bayada is an extremely knowledgeable dis-

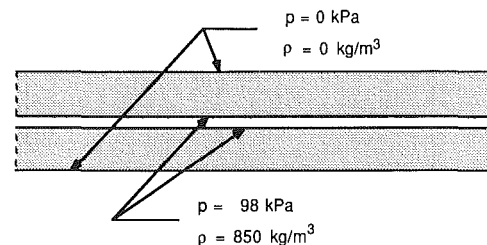

(a) Lundholm bearing (Case I)

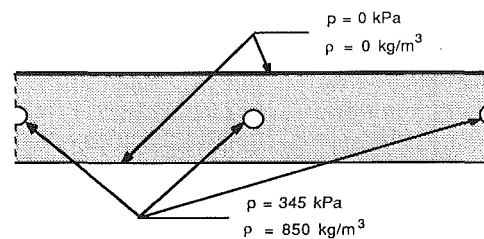

(b) Phelan bearing (Case I)

Fig. C1 Boundary conditions (overspecified)

cusser on this topic, and his questions become successively more difficult:

His first question regarding the putative value of our algorithm seems rhetorical, and the answers he suggests are satisfactory as they stand.

Regarding the issue of potential applications, we quote from our text, "Though mass conservation may not always be a particularly important determinant of journal motion, the attribute becomes critical when external load must be carried by film portions which may instantaneously be incompletely filled with liquid." We can only speculate that such is probably *always* the case in wristpin bearings and *often* so for other engine bearings as well. It may also happen in squeeze-film dampers, but that is much less clear.

Initial and boundary conditions proposed in the Problem Formulation (and amplified in footnotes 4 and 5) of our *previous* paper (describing the algorithm) continue to vex both readers and authors. We believe that there can be boundary

<sup>1</sup>INSA Math, Villeurbanne, France.
